# Supplementary material for: Variable training but not sleep improves consolidation of motor adaptation
Source: PubMed Central journal article supplement (PMC6206141; doi:10.1038/s41598-018-34225-w), 2018-10-29
Supplement: 41598_2018_34225_MOESM1_ESM.pdf [file 41598_2018_34225_MOESM1_ESM.pdf]

1 **Supplementary Information**

2

3 **Variable training but not sleep improves consolidation of motor**  
4 **adaptation**

5 **Benjamin Thüerer<sup>1\*†</sup>, Frederik D. Weber<sup>2,3\*†</sup>, Jan Born<sup>2 ‡</sup>, Thorsten Stein<sup>1 ‡</sup>**

6 <sup>1</sup>BioMotion Center, Institute of Sports and Sports Science, Karlsruhe Institute of Technology, 76131  
7 Karlsruhe, Germany

8 <sup>2</sup>Institute for Medical Psychology and Behavioral Neurobiology, University of Tübingen, 72074  
9 Tübingen, Germany

10 <sup>3</sup>Donders Institute for Brain, Cognition, and Behaviour, Radboud University Medical Centre, 6525 EN  
11 Nijmegen, the Netherlands

12 \*Corresponding authors: benjamin.thuerer@gmail.com, research@frederikweber.com

13 †these authors contributed equally to this work

14 ‡these authors contributed equally to this work

15

16 **Supplementary Figure S1**

17

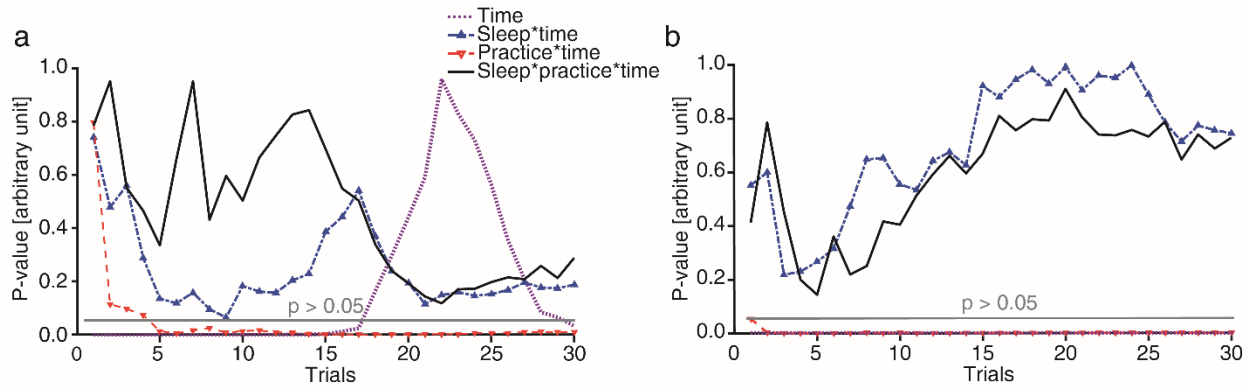

18

19 **Figure S1:** Explorative behavioral results. (a) Explorative analysis per trial, *p*-values of different factors  
20 and their interactions in mixed-model ANOVAs analyzing the consolidation effect from Training to  
21 Posttest; and (b) Training to Transfer. All *p*-values displayed in this figure were not corrected for multiple  
22 comparisons

23 **Supplementary Table S2**

24 *ANOVA results of different behavioral parameters.*

| <i>n</i> = 48  |                         | AngleVp  |                  | PDmax    |                  | PDVmax   |                  | FeedbackPD |                  |
|----------------|-------------------------|----------|------------------|----------|------------------|----------|------------------|------------|------------------|
|                |                         | <i>F</i> | <i>p</i>         | <i>F</i> | <i>p</i>         | <i>F</i> | <i>p</i>         | <i>F</i>   | <i>p</i>         |
| Adaptation     | time                    | 262.5    | <b>&lt;0.001</b> | 133.6    | <b>&lt;0.001</b> | 57.9     | <b>&lt;0.001</b> | 56.9       | <b>&lt;0.001</b> |
|                | time*sleep              | 0.6      | 0.457            | 1.1      | 0.301            | 0.8      | 0.388            | 0.1        | 0.711            |
|                | time*practice           | <0.1     | 0.847            | 2.3      | 0.134            | 2.9      | 0.096            | 0.5        | 0.489            |
|                | time*practice*<br>sleep | <0.1     | 0.94             | 0.1      | 0.73             | <0.1     | 0.896            | <0.1       | 0.881            |
|                | sleep                   | 0.1      | 0.748            | 0.1      | 0.793            | 0.7      | 0.398            | <0.1       | 0.96             |
|                | practice                | 1.2      | 0.274            | 1.3      | 0.261            | 3.9      | 0.054            | 0.1        | 0.73             |
|                | sleep*practice          | 0.1      | 0.74             | 1.5      | 0.232            | 0.3      | 0.861            | 0.4        | 0.509            |
| Consolidation  | time                    | 15.4     | <b>&lt;0.001</b> | 1.2      | 0.273            | 13.6     | <b>&lt;0.001</b> | 0.2        | 0.644            |
|                | time*sleep              | 0.5      | 0.484            | 1.8      | 0.189            | 0.5      | 0.479            | 0.1        | 0.756            |
|                | time*practice           | <0.1     | 0.897            | 4.6      | <b>0.037</b>     | 10.0     | <b>0.003</b>     | 0.1        | 0.739            |
|                | time*practice*<br>sleep | <0.1     | 0.847            | 1.2      | 0.288            | 3.0      | 0.088            | 0.1        | 0.801            |
|                | sleep                   | 0.3      | 0.568            | <0.1     | 0.928            | 3.8      | 0.056            | 0.4        | 0.526            |
|                | practice                | 0.9      | 0.346            | 9.0      | <b>0.004</b>     | 8.9      | <b>0.005</b>     | <0.1       | 0.951            |
|                | sleep*practice          | <0.1     | 0.891            | 1.0      | 0.317            | 0.8      | 0.386            | 0.3        | 0.61             |
| Generalization | time                    | 618.9    | <b>&lt;0.001</b> | 435.4    | <b>&lt;0.001</b> | 351.2    | <b>&lt;0.001</b> | 235.8      | <b>&lt;0.001</b> |
|                | time*sleep              | 0.4      | 0.525            | 0.2      | 0.627            | 4.2      | <b>0.045</b>     | 4.3        | <b>0.044</b>     |
|                | time*practice           | 1.9      | 0.171            | 13.7     | <b>&lt;0.001</b> | 19.8     | <b>&lt;0.001</b> | 5.2        | <b>0.028</b>     |
|                | time*practice*<br>sleep | 1.4      | 0.242            | 0.4      | 0.525            | <0.1     | 0.849            | 0.9        | 0.361            |
|                | sleep                   | 1.4      | 0.240            | 0.8      | 0.365            | 8.1      | <b>0.007</b>     | 3.4        | 0.073            |
|                | practice                | 1.2      | 0.282            | 0.7      | 0.394            | 0.6      | 0.453            | 2.5        | 0.118            |
|                | sleep*practice          | 0.5      | 0.472            | 0.1      | 0.745            | <0.1     | 0.938            | 0.3        | 0.569            |

25 This table shows uncorrected p-values of different ANOVAs performed for each research question and  
 26 each performance parameter. Between subject factors are sleep (Wake, Sleep) and practice (Random,

27 Blocked). Within subject factor time changed according to the research question (adaptation: First  
28 Training Trials, Last Training Trials; consolidation: Last Training Trials, Posttest; generalization: Last  
29 Training Trials, Transfer). AngleVp describes the angle between a straight line and subject's trajectory at  
30 peak velocity. This parameter captures mostly feedforward mechanisms. PDmax and PDVmax capture  
31 the maximum perpendicular displacement (PD) of the trajectory and the PD at peak velocity. Both  
32 parameters are affected by feedforward and feedback mechanisms. FeedbackPD describes the difference  
33 from PD at peak velocity to 5% of the peak velocity at the end of the movement. This parameter reflects  
34 mostly feedback processes.

35 **Supplementary Table S3**

36 *Correlations between EEG alpha power during training and consolidation*

|          |         |        | ROI_left     |              | ROI_right |              |
|----------|---------|--------|--------------|--------------|-----------|--------------|
|          |         |        | Planning     | Execution    | Planning  | Execution    |
| Posttest | Blocked | $\rho$ | 0.3          | 0.22         | 0.33      | 0.23         |
|          |         | $p$    | 0.16         | 0.302        | 0.115     | 0.283        |
|          | Random  | $\rho$ | 0.12         | 0.15         | 0.16      | 0.17         |
|          |         | $p$    | 0.57         | 0.486        | 0.47      | 0.412        |
| Transfer | Blocked | $\rho$ | 0.6          | 0.55         | 0.39      | 0.49         |
|          |         | $p$    | <b>0.003</b> | <b>0.006</b> | 0.061     | <b>0.017</b> |
|          | Random  | $\rho$ | -0.1         | 0.04         | 0.08      | 0.2          |
|          |         | $p$    | 0.654        | 0.872        | 0.724     | 0.367        |

37

38 This table shows Spearman's rho [ $\rho$ ] and uncorrected p-values of the associations between the EEG alpha  
 39 power during training and the consolidation from Training-to-Posttest and Training-to-Transfer for the  
 40 Blocked and Random groups.

41 **Supplementary Table S4**

42 *Sleep states and correlations with motor adaptation and consolidation*

| Sleep parameter ( $n = 22$ ) |        |            | Spearman rank correlations with behavior [ $\rho$ ] |          |          |                           |                           |
|------------------------------|--------|------------|-----------------------------------------------------|----------|----------|---------------------------|---------------------------|
|                              |        |            | Training                                            | Posttest | Transfer | Posttest<br>-<br>Training | Transfer<br>-<br>Training |
| Stages                       |        |            |                                                     |          |          |                           |                           |
| TST [min]                    | 435.91 | $\pm 8.76$ | -0.219                                              | -0.338   | -0.152   | 0.160                     | -0.043                    |
| Sleep onset [min]            | 18.56  | $\pm 3.70$ | -0.092                                              | -0.074   | -0.011   | 0.040                     | 0.179                     |
| WASO [%]                     | 2.91   | $\pm 0.43$ | -0.238                                              | -0.043   | 0.207    | 0.357                     | <b>0.433*</b>             |
| Stage 1 [%]                  | 7.09   | $\pm 0.60$ | -0.342                                              | -0.329   | -0.152   | 0.123                     | 0.040                     |
| Stage 2 [%]                  | 45.23  | $\pm 1.52$ | 0.234                                               | 0.342    | -0.030   | -0.174                    | -0.073                    |
| SWS [%]                      | 27.64  | $\pm 1.50$ | 0.043                                               | -0.097   | 0.025    | -0.019                    | -0.082                    |
| Non-REM [%]                  | 72.86  | $\pm 0.84$ | 0.420                                               | 0.281    | 0.058    | -0.377                    | -0.172                    |
| REM [%]                      | 17.14  | $\pm 0.71$ | -0.051                                              | -0.095   | -0.152   | 0.071                     | -0.158                    |
| Spindle power peak           | 13.32  | $\pm 0.11$ | <b>-0.500*</b>                                      | -0.163   | 0.072    | 0.367                     | 0.363                     |

43  
44 Means  $\pm$  s.e.m for the sleep parameters in the left columns. The right columns show Spearman's rank  
45 correlation of sleep parameters with behavioral measures of mean motor error (enclosed area) during end  
46 of Training, Posttest, Transfer, as well as changes from Training to Retest (Posttest – Training) and  
47 Training to Transfer (Transfer – Training). Note that for Posttest – Training and Transfer – Training a  
48 negative correlation is indicative of beneficial relation on consolidation success. Given are the total sleep  
49 time (TST), sleep onset (with reference to the time of lights off and beginning of first occurrence of stage  
50 1-sleep epoch followed by stage 2-sleep), and time spent awake after sleep onset (WASO), sleep stage 1,  
51 sleep stage 2, SWS, non-REM (S2 + SWS) and REM in percentage of total sleep time. In addition, the  
52 sleep spindle power peak in the non-REM sleep power spectra of 12–15 Hz frequency range, Significant  
53 correlations are in bold, \*  $p < 0.05$ , uncorrected for multiple comparisons.

54 **Supplementary Table S5**55 *Sleep parameters and events and correlations with motor adaptation and consolidation*

| Sleep parameter ( $n = 22$ ) |                 | Spearman rank correlations with behavior [ $\rho$ ] |                 |                |                 |                     |                     |               |
|------------------------------|-----------------|-----------------------------------------------------|-----------------|----------------|-----------------|---------------------|---------------------|---------------|
| Analysis                     | Property        | Electrode                                           | Training        | Posttest       | Transfer        | Posttest - Training | Transfer - Training |               |
| Power density (Stage 2)      | (0.5-4 Hz)      | P3 <sup>†</sup>                                     | 0.313           | -0.152         | 0.017           | <b>-0.501*</b>      | -0.252              |               |
| Power density (REM)          | (0.5-4 Hz)      | C4 <sup>†</sup>                                     | 0.339           | -0.113         | 0.327           | <b>-0.435*</b>      | -0.008              |               |
| Spindle                      | duration        | C3                                                  | <b>0.536*</b>   | -0.075         | 0.204           | <b>-0.517*</b>      | -0.093              |               |
|                              |                 | C4 <sup>†</sup>                                     | <b>0.503*</b>   | -0.126         | 0.110           | <b>-0.532*</b>      | -0.204              |               |
|                              |                 | Cz                                                  | <b>0.487*</b>   | -0.037         | 0.179           | <b>-0.467*</b>      | -0.081              |               |
|                              |                 | F4 <sup>‡</sup>                                     | 0.442           | -0.251         | 0.150           | <b>-0.453*</b>      | -0.093              |               |
|                              |                 | P3                                                  | <b>0.466*</b>   | -0.081         | 0.249           | <b>-0.481*</b>      | -0.049              |               |
|                              |                 | P4                                                  | <b>0.430*</b>   | -0.125         | 0.277           | <b>-0.517*</b>      | -0.010              |               |
|                              |                 | Pz <sup>‡</sup>                                     | 0.424           | -0.183         | 0.284           | <b>-0.549*</b>      | 0.005               |               |
|                              | frequency       | C4 <sup>†</sup>                                     | <b>-0.535*</b>  | -0.101         | 0.109           | <b>0.453*</b>       | <b>0.470*</b>       |               |
|                              |                 | Cz                                                  | <b>-0.562**</b> | -0.102         | 0.020           | <b>0.470*</b>       | 0.360               |               |
|                              |                 | Fz                                                  | <b>-0.573**</b> | -0.141         | 0.054           | <b>0.449*</b>       | 0.411               |               |
|                              |                 | Upstate spindle chirp                               | C3              | -0.348         | -0.034          | 0.255               | 0.318               | <b>0.430*</b> |
|                              |                 |                                                     | C4 <sup>†</sup> | -0.240         | -0.018          | 0.330               | 0.384               | <b>0.491*</b> |
|                              |                 |                                                     | P3              | -0.187         | 0.089           | 0.302               | 0.315               | <b>0.450*</b> |
|                              |                 |                                                     | P4              | -0.223         | 0.072           | 0.266               | 0.273               | <b>0.439*</b> |
| count                        | C3              | 0.266                                               | -0.189          | -0.316         | <b>-0.482*</b>  | <b>-0.490*</b>      |                     |               |
|                              | C4 <sup>†</sup> | 0.252                                               | -0.187          | -0.395         | <b>-0.465*</b>  | <b>-0.547*</b>      |                     |               |
|                              | Cz              | 0.248                                               | -0.101          | <b>-0.434*</b> | -0.399          | <b>-0.582**</b>     |                     |               |
|                              | Fz              | 0.413                                               | 0.082           | -0.268         | <b>-0.456*</b>  | <b>-0.494*</b>      |                     |               |
|                              | P3              | 0.382                                               | -0.100          | -0.379         | <b>-0.548**</b> | <b>-0.569**</b>     |                     |               |
|                              | P4              | 0.233                                               | -0.058          | -0.397         | -0.399          | <b>-0.480*</b>      |                     |               |
|                              | Pz <sup>‡</sup> | 0.313                                               | -0.122          | -0.305         | <b>-0.502*</b>  | <b>-0.454*</b>      |                     |               |
| density                      | C3              | 0.268                                               | -0.153          | -0.295         | <b>-0.469*</b>  | <b>-0.481*</b>      |                     |               |
|                              | C4 <sup>†</sup> | 0.310                                               | -0.132          | -0.319         | <b>-0.486*</b>  | <b>-0.491*</b>      |                     |               |

|                       |     |                |        |        |                 |                 |
|-----------------------|-----|----------------|--------|--------|-----------------|-----------------|
|                       | Cz  | 0.296          | -0.146 | -0.351 | <b>-0.499*</b>  | <b>-0.548**</b> |
|                       | F3‡ | <b>0.498*</b>  | 0.293  | -0.226 | <b>-0.451*</b>  | -0.441          |
|                       | Fz  | <b>0.426*</b>  | 0.129  | -0.258 | <b>-0.436*</b>  | <b>-0.465*</b>  |
|                       | P3  | 0.343          | -0.091 | -0.368 | <b>-0.518*</b>  | <b>-0.549**</b> |
|                       | P4  | 0.311          | -0.008 | -0.318 | <b>-0.462*</b>  | <b>-0.443*</b>  |
|                       | Pz‡ | 0.308          | -0.123 | -0.302 | <b>-0.499*</b>  | -0.438          |
| duration              | C3  | 0.394          | -0.198 | -0.137 | <b>-0.471*</b>  | -0.391          |
|                       | C4† | <b>0.475*</b>  | -0.329 | 0.138  | <b>-0.601**</b> | -0.161          |
|                       | Cz  | <b>0.455*</b>  | -0.231 | -0.013 | <b>-0.615**</b> | -0.295          |
|                       | P3  | 0.369          | -0.286 | -0.047 | <b>-0.505*</b>  | -0.252          |
|                       | P4  | <b>0.469*</b>  | -0.153 | 0.016  | <b>-0.512*</b>  | -0.268          |
|                       | Pz‡ | 0.353          | -0.287 | -0.205 | <b>-0.544*</b>  | -0.439          |
| frequency             | C4† | <b>-0.492*</b> | -0.071 | 0.081  | <b>0.442*</b>   | <b>0.438*</b>   |
|                       | F3‡ | <b>-0.498*</b> | -0.265 | 0.171  | 0.367           | <b>0.445*</b>   |
|                       | Fz  | <b>-0.525*</b> | -0.103 | 0.040  | <b>0.436*</b>   | 0.387           |
| SD of slow-wave delay | Cz  | -0.225         | -0.196 | 0.302  | 0.125           | <b>0.427*</b>   |

56

57 Exploratory analysis of detailed sleep parameter's relation to consolidation during sleep. The right  
58 columns show Spearman's rank correlation of sleep parameters with behavioral measures of mean motor  
59 error (enclosed area) during end of Training, Posttest, Transfer, as well as changes from Training to  
60 Posttest (Posttest – Training) and Training to Transfer (Transfer – Training). Note that for Posttest –  
61 Training and Transfer – Training a negative correlation is indicative of a beneficial relation on  
62 consolidation success. Only relations are listed that reached the significant threshold for a relation with  
63 changes from either Training to Posttest or from Training to Transfer in any of the electrodes (Pz  
64 electrode location was excluded due to reduced sample size). Standard deviation (SD) of slow-wave delay  
65 was measured to the detected preceding slow wave down-state. All other measures did not reach  
66 significance for relations with these two consolidation measures. Some electrodes went bad or off in some  
67 subjects resulting in reduced number of subjects for correlations, † n = 21, ‡ n = 20. Significant  
68 correlations are in bold, \*\*  $p < 0.01$ , \*  $p < 0.05$ , uncorrected for multiple comparisons.

69



## 70 **Supplementary Methods**

71 Example MATLAB code for computing the force field compensation factor running on MATLAB  
72 R2017a on Windows:

```
73
74 % x_forces: measured forces in x-direction
75 % y_forces: measured forces in y-direction
76 % velocityX: measured velocity in x-direction
77 % velocityY: measured velocity in y-direction
78
79 % compute trial direction vector (from start to target)
80 x_v1_raw = x_pos(1)-x_pos(end);
81 y_v1_raw = y_pos(1)-y_pos(end);
82 vec1_raw = [x_v1_raw; y_v1_raw];
83
84 % compute vector orthogonal to target direction
85 FFMatrix = [0 -1; 1 0]; % for CCW force field
86 vec2_raw = FFMatrix * vec1_raw;
87
88 % compute projected force in orthogonal direction
89 for v = 1:length(samples)
90     vecForce_raw = [x_forces(v);y_forces(v)];
91     proj_force(v) = norm((dot(vecForce_raw,vec2_raw) / dot(vec2_raw, vec2_raw)) *vec2_raw);
92     VecAngle(v) = rad2deg(atan2(norm(cross([vecForce_raw' 0], ...
93     [vec2_raw' 0])),dot(vecForce_raw, vec2_raw)));
94 end
95 VecAngle = VecAngle > 90;
96 proj_force(VecAngle) = proj_force(VecAngle)*(-1);
97
98 % compute ideal force according to the trials velocity
99 velocity = [velocityX'; velocityY'];
100 FFMatrix = [0 15;-15 0]; % example force field matrix in CW direction
101 forceIdealArray = FFMatrix * velocity;
102 idealForce = [];
103 for fct=1:length(forceIdealArray)
104     idealForce(fct)= sqrt(forceIdealArray(1, fct)^2 + ...
105     forceIdealArray(2, fct)^2);
106 end
107
108 % compute fit with degree of 1 and compute the percentage force- field compensation
109 p = polyfit(idealForce, proj_force(1:end-1), 1);
110 FFC_factor = p(1)*100;
```
